# Supplementary material
Source: PubMed Central journal article supplement (PMC9588703)

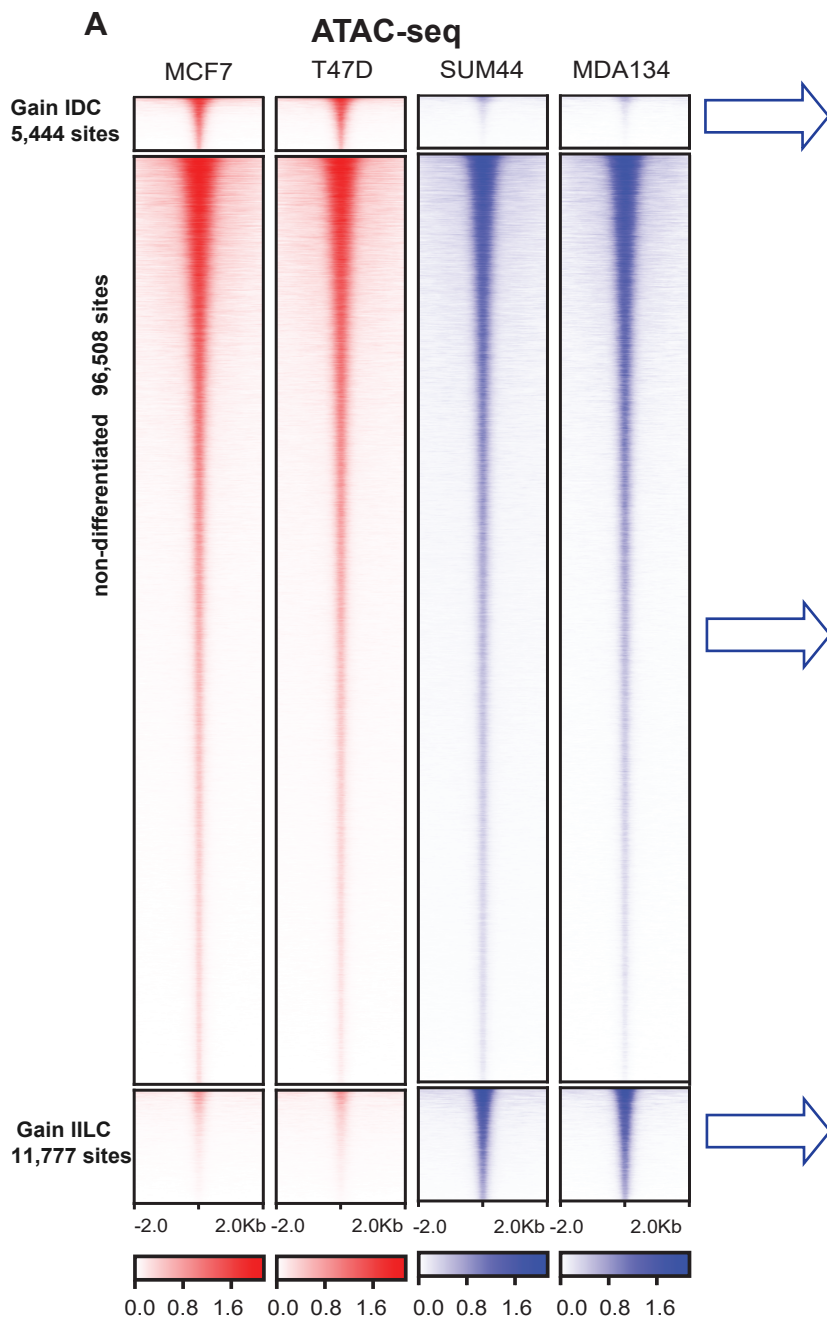

## Motifs Enriched in IDC gained Sites

| MOTIF NAME                                                  | pValue   | % of Target Sequences with Motif | % of Background Sequences with Motif |
|-------------------------------------------------------------|----------|----------------------------------|--------------------------------------|
| CTCF(Zf)/<br>CD4+CTCF-ChIP-Seq(Barski_et_al.)/Homer         | 1e-621   | 24.50%                           | 2.63%                                |
| BORIS(Zf)/<br>K562-CTCF-ChIP-Seq(GSE32465)/Homer            | 1e-501   | 29.32%                           | 5.49%                                |
| GRHL2(CP2)/<br>HBE-GRHL2-ChIP-Seq(GSE46194)/Homer           | 1.00E-43 | 9.99%                            | 4.67%                                |
| BATF(bZIP)/<br>Th17-BATF-ChIP-Seq(GSE39756)/Homer           | 1.00E-35 | 13.69%                           | 7.90%                                |
| Atf3(bZIP)/<br>GBM-ATF3-ChIP-Seq(GSE33912)/Homer            | 1.00E-33 | 13.82%                           | 8.11%                                |
| Fra2(bZIP)/<br>Striatum-Fra2-ChIP-Seq(GSE43429)/Homer       | 1.00E-33 | 11.01%                           | 5.97%                                |
| JunB(bZIP)/<br>DendriticCells-Junb-ChIP-Seq(GSE36099)/Homer | 1.00E-33 | 12.13%                           | 6.83%                                |

## Motifs Enriched in non-differentiated Sites

| MOTIF NAME                                               | pValue  | % of Target Sequences with Motif | % of Background Sequences with Motif |
|----------------------------------------------------------|---------|----------------------------------|--------------------------------------|
| CTCF(Zf)/<br>CD4+CTCF-ChIP-Seq(Barski_et_al.)/Homer      | 1e-5630 | 14.89%                           | 2.20%                                |
| BORIS(Zf)/<br>K562-CTCF-ChIP-Seq(GSE32465)/Homer         | 1e-4079 | 17.70%                           | 4.48%                                |
| FOXM1(Forkhead)/<br>MCF7-FOXM1-ChIP-Seq(GSE72977)/Homer  | 1e-1679 | 24.80%                           | 13.10%                               |
| FOXA1(Forkhead)/<br>MCF7-FOXA1-ChIP-Seq(GSE26831)/Homer  | 1e-1667 | 24.06%                           | 12.57%                               |
| FOXA1(Forkhead)/<br>LNCAP-FOXA1-ChIP-Seq(GSE27824)/Homer | 1e-1641 | 27.60%                           | 15.38%                               |
| Jun-AP1(bZIP)/<br>K562-cJun-ChIP-Seq(GSE31477)/Homer     | 1e-1524 | 8.99%                            | 2.80%                                |
| Fosl2(bZIP)/<br>3T3L1-Fosl2-ChIP-Seq(GSE56872)/Homer     | 1e-1517 | 11.12%                           | 4.02%                                |

## Motifs Enriched in ILC gained Sites

| MOTIF NAME                                                       | pValue | % of Target Sequences with Motif | % of Background Sequences with Motif |
|------------------------------------------------------------------|--------|----------------------------------|--------------------------------------|
| FOXA1(Forkhead)/<br>LNCAP-FOXA1-ChIP-Seq(GSE27824)/Homer         | 1e-867 | 41.14%                           | 14.38%                               |
| FOXA1(Forkhead)/<br>MCF7-FOXA1-ChIP-Seq(GSE26831)/Homer          | 1e-795 | 35.40%                           | 11.52%                               |
| FOXM1(Forkhead)/<br>MCF7-FOXM1-ChIP-Seq(GSE72977)/Homer          | 1e-765 | 36.45%                           | 12.49%                               |
| Foxa2(Forkhead)/<br>Liver-Foxa2-ChIP-Seq(GSE25694)/Homer         | 1e-688 | 31.96%                           | 10.54%                               |
| Fox:Ebox(Forkhead,bHLH)/<br>Panc1-Foxa2-ChIP-Seq(GSE47459)/Homer | 1e-520 | 38.78%                           | 17.42%                               |
| AP-2gamma(AP2)/<br>MCF7-TFAP2C-ChIP-Seq(GSE21234)/Homer          | 1e-515 | 35.85%                           | 15.37%                               |
| Foxa3(Forkhead)/<br>Liver-Foxa3-ChIP-Seq(GSE77670)/Homer         | 1e-515 | 44.89%                           | 22.22%                               |

B

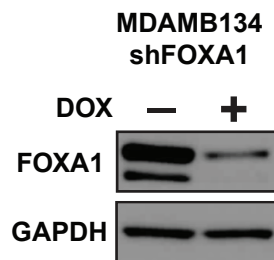

C

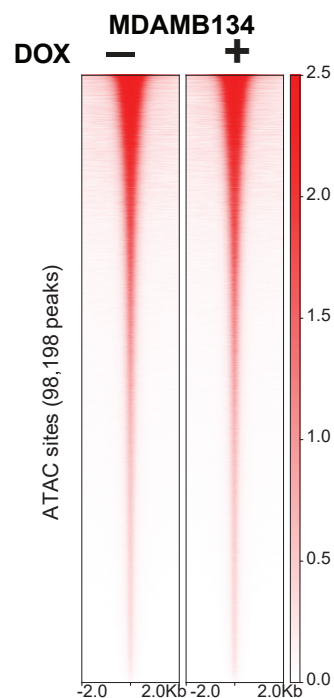

Supplement: NIHMS1830937-supplement-2.pdf [file NIHMS1830937-supplement-2.pdf]
