# Supplementary material
Source: PubMed Central journal article supplement (PMC9588703)
Supplement: NIHMS1830937-supplement-4.pdf [file NIHMS1830937-supplement-4.pdf]

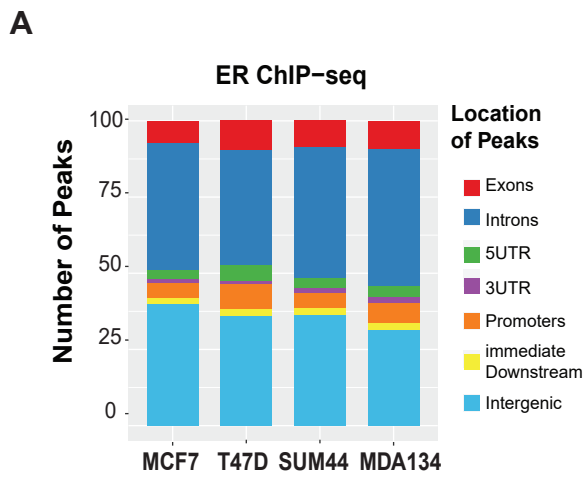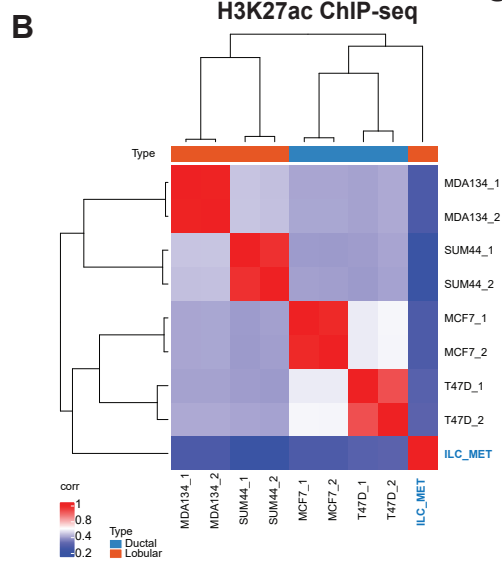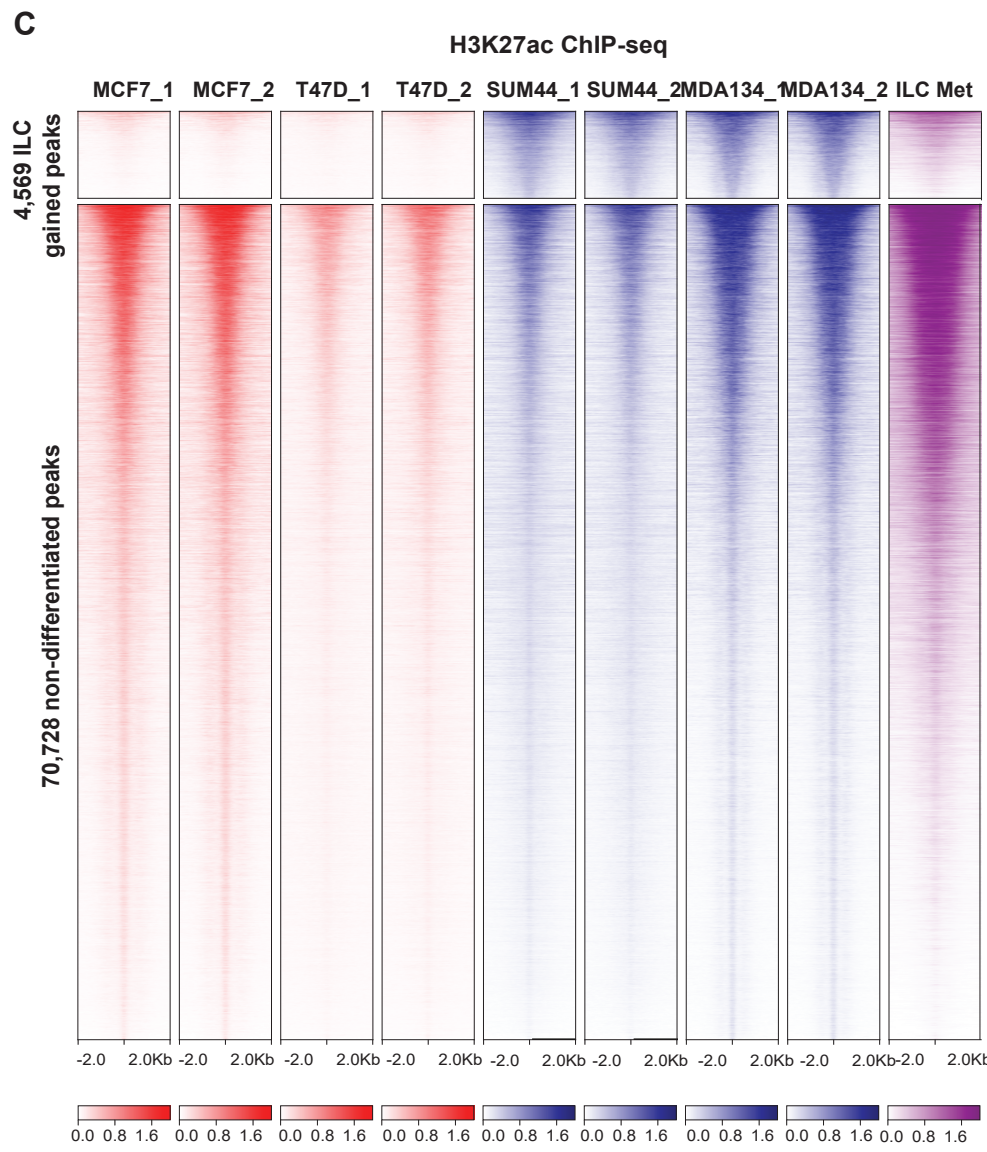

**H3K27ac Motifs Enriched in ILC gained Sites**

| MOTIF NAME                                                      | pValue | % of Target Sequences with Motif | % of Background Sequences with Motif |
|-----------------------------------------------------------------|--------|----------------------------------|--------------------------------------|
| FOXA1(Forkhead)/LNCAP-FOXA1-ChIP-Seq(GSE27824)/Homer            | 1e-115 | 36.89%                           | 21.04%                               |
| FOXM1(Forkhead)/MCF7-FOXM1-ChIP-Seq(GSE72977)/Homer             | 1e-105 | 32.67%                           | 18.19%                               |
| FOXA1(Forkhead)/MCF7-FOXA1-ChIP-Seq(GSE26831)/Homer             | 1e-104 | 31.37%                           | 17.22%                               |
| Foxa2(Forkhead)/Liver-Foxa2-ChIP-Seq(GSE25694)/Homer            | 1e-81  | 26.40%                           | 14.70%                               |
| Fox:Ebox(Forkhead,bHLH)/Panc1-Foxa2-ChIP-Seq(GSE47459)/Homer    | 1e-74  | 31.92%                           | 19.61%                               |
| Foxa3(Forkhead)/Liver-Foxa3-ChIP-Seq(GSE77670)/Homer            | 1e-67  | 13.09%                           | 5.68%                                |
| PHA-4(Forkhead)/cElegans-Embryos-PHA4-ChIP-Seq(modEncode)/Homer | 1e-62  | 64.97%                           | 51.83%                               |

**H3K27ac Motifs in non-differentiated Sites**

| MOTIF NAME                                                      | pValue | % of Target Sequences with Motif | % of Background Sequences with Motif |
|-----------------------------------------------------------------|--------|----------------------------------|--------------------------------------|
| FOXM1(Forkhead)/MCF7-FOXM1-ChIP-Seq(GSE72977)/Homer             | 1e-440 | 28.23%                           | 20.44%                               |
| FOXA1(Forkhead)/LNCAP-FOXA1-ChIP-Seq(GSE27824)/Homer            | 1e-438 | 31.91%                           | 23.76%                               |
| FOXA1(Forkhead)/MCF7-FOXA1-ChIP-Seq(GSE26831)/Homer             | 1e-431 | 27.70%                           | 20.03%                               |
| Foxa2(Forkhead)/Liver-Foxa2-ChIP-Seq(GSE25694)/Homer            | 1e-383 | 22.39%                           | 15.76%                               |
| Foxa3(Forkhead)/Liver-Foxa3-ChIP-Seq(GSE77670)/Homer            | 1e-317 | 10.80%                           | 6.56%                                |
| Fox:Ebox(Forkhead,bHLH)/Panc1-Foxa2-ChIP-Seq(GSE47459)/Homer    | 1e-317 | 24.89%                           | 18.60%                               |
| PHA-4(Forkhead)/cElegans-Embryos-PHA4-ChIP-Seq(modEncode)/Homer | 1e-233 | 58.97%                           | 52.24%                               |
