# Supplementary material
Source: PubMed Central journal article supplement (PMC9588703)

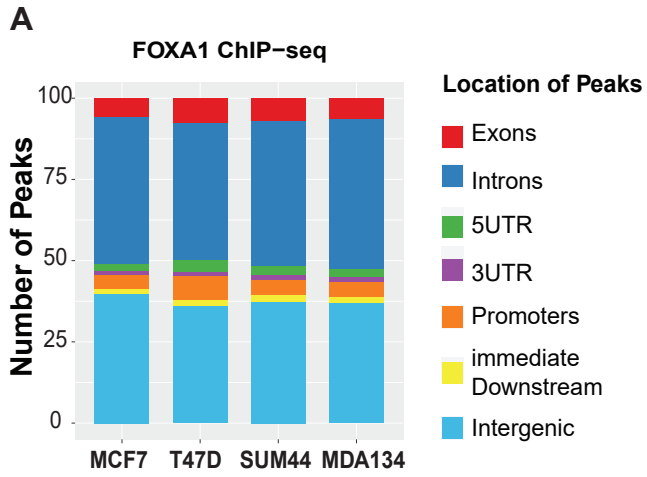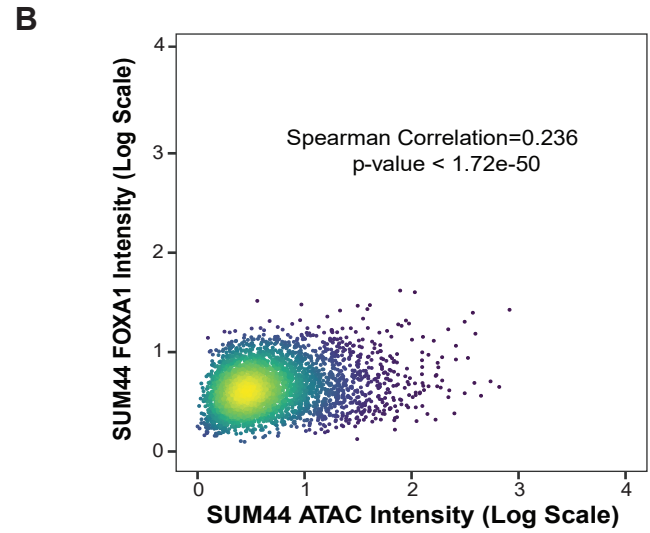

Supplement: NIHMS1830937-supplement-3.pdf [file NIHMS1830937-supplement-3.pdf]

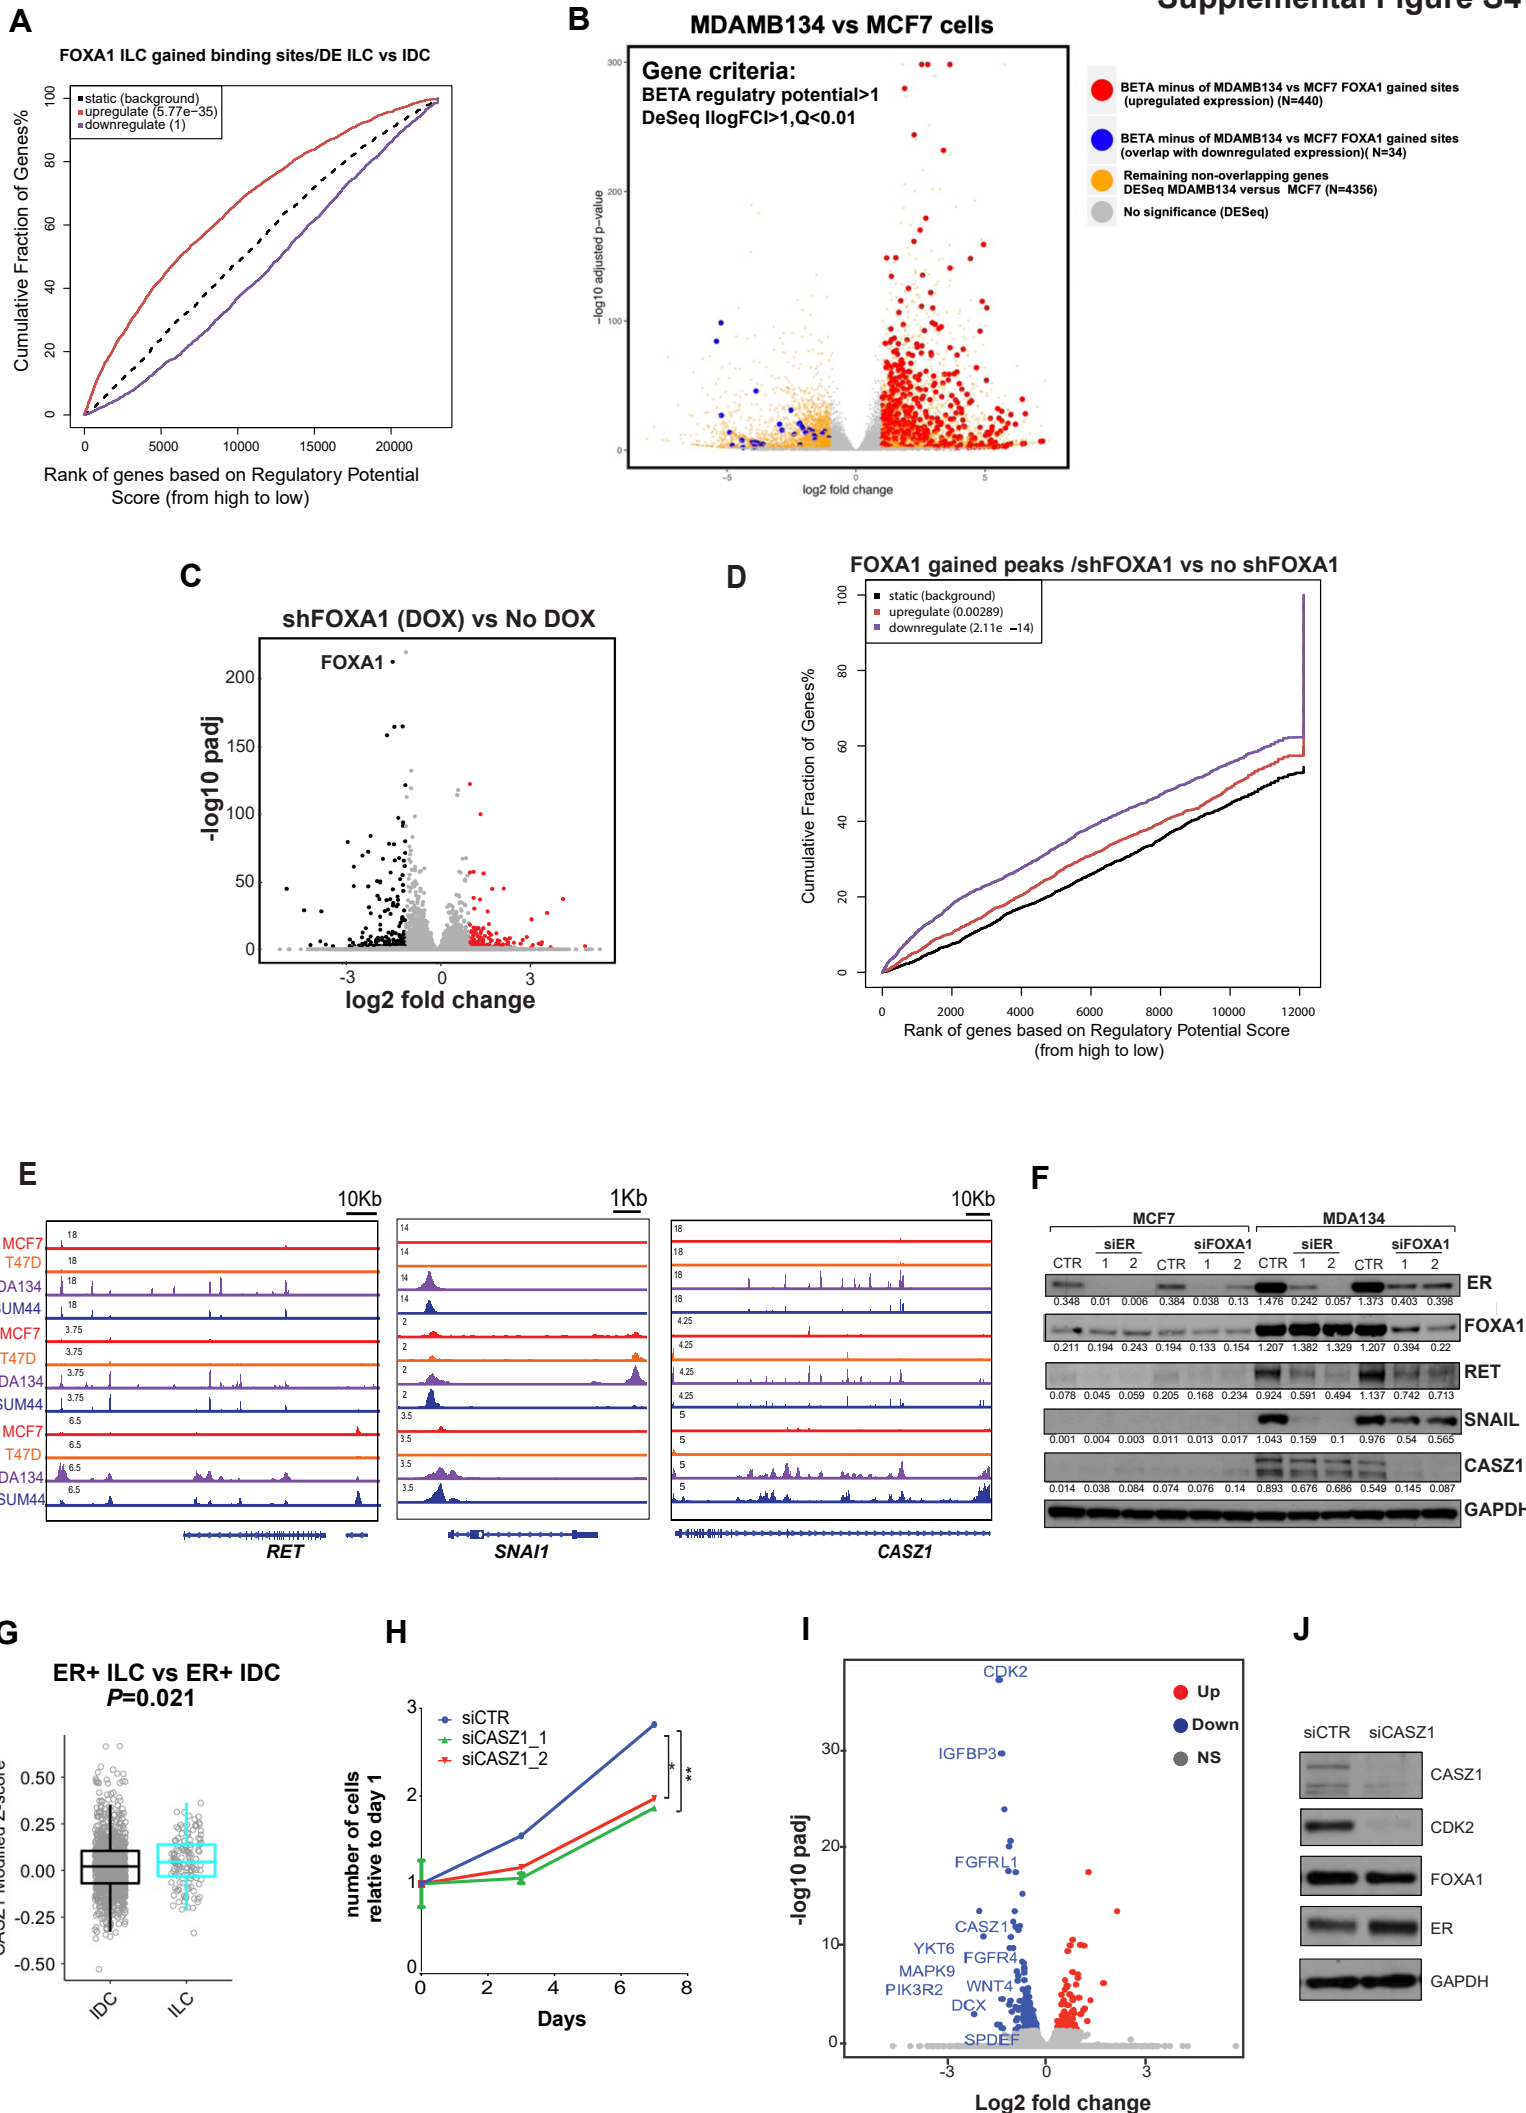

Supplement: NIHMS1830937-supplement-5.pdf [file NIHMS1830937-supplement-5.pdf]

# Supplemental Figure S5

**A**

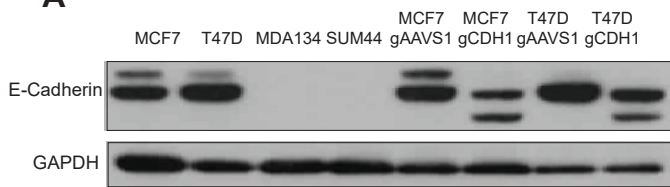

**C**

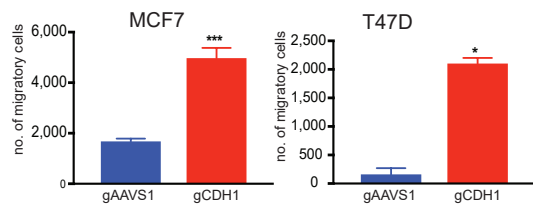

**D**

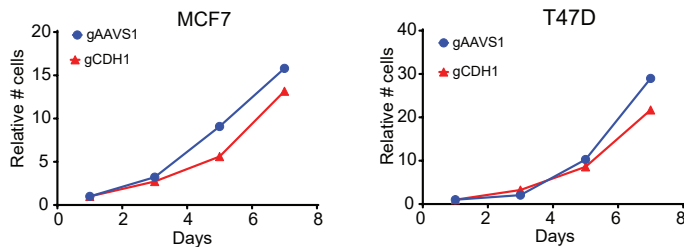

**B**

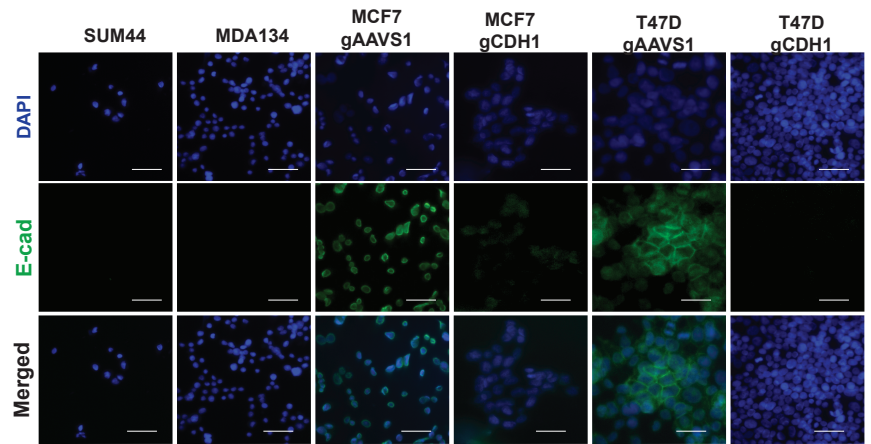

**E**

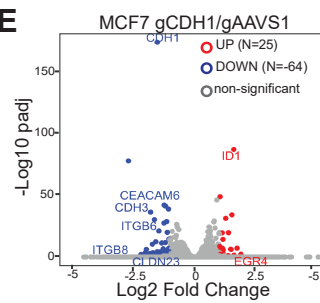

**F**

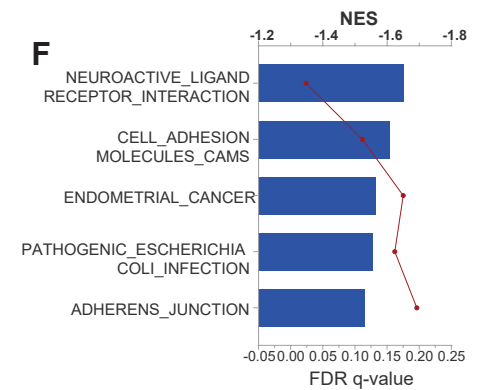

**G**

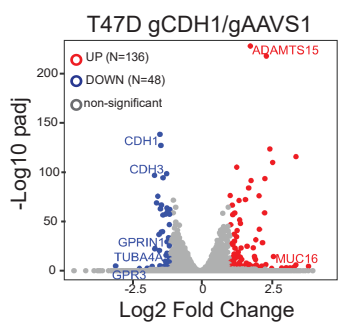

**H**

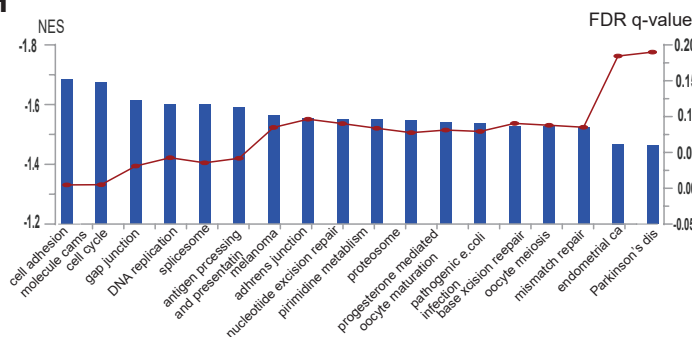

**K**

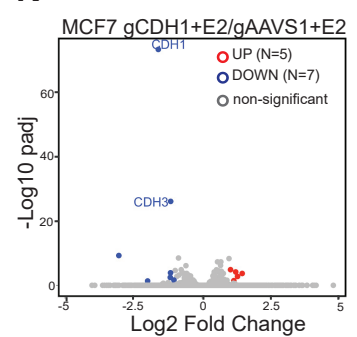

**I**

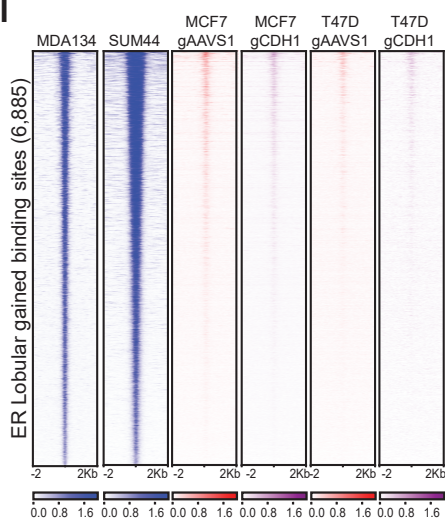

**J**

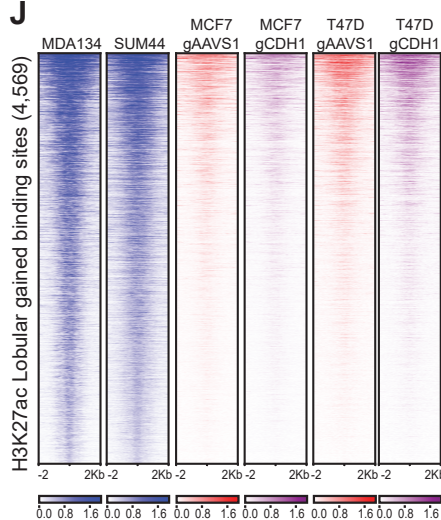

**M**

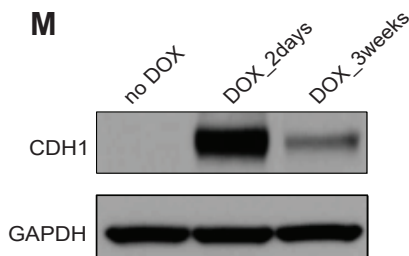

**N**

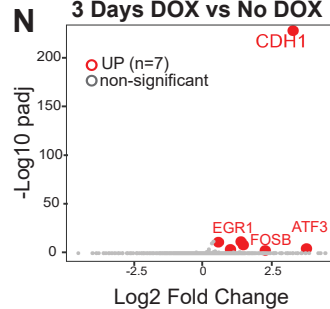

**O**

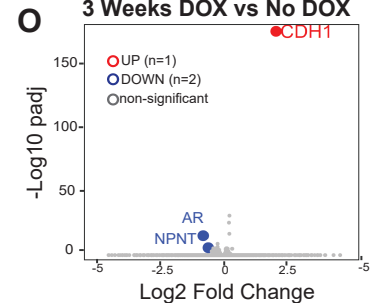

Supplement: NIHMS1830937-supplement-6.pdf [file NIHMS1830937-supplement-6.pdf]

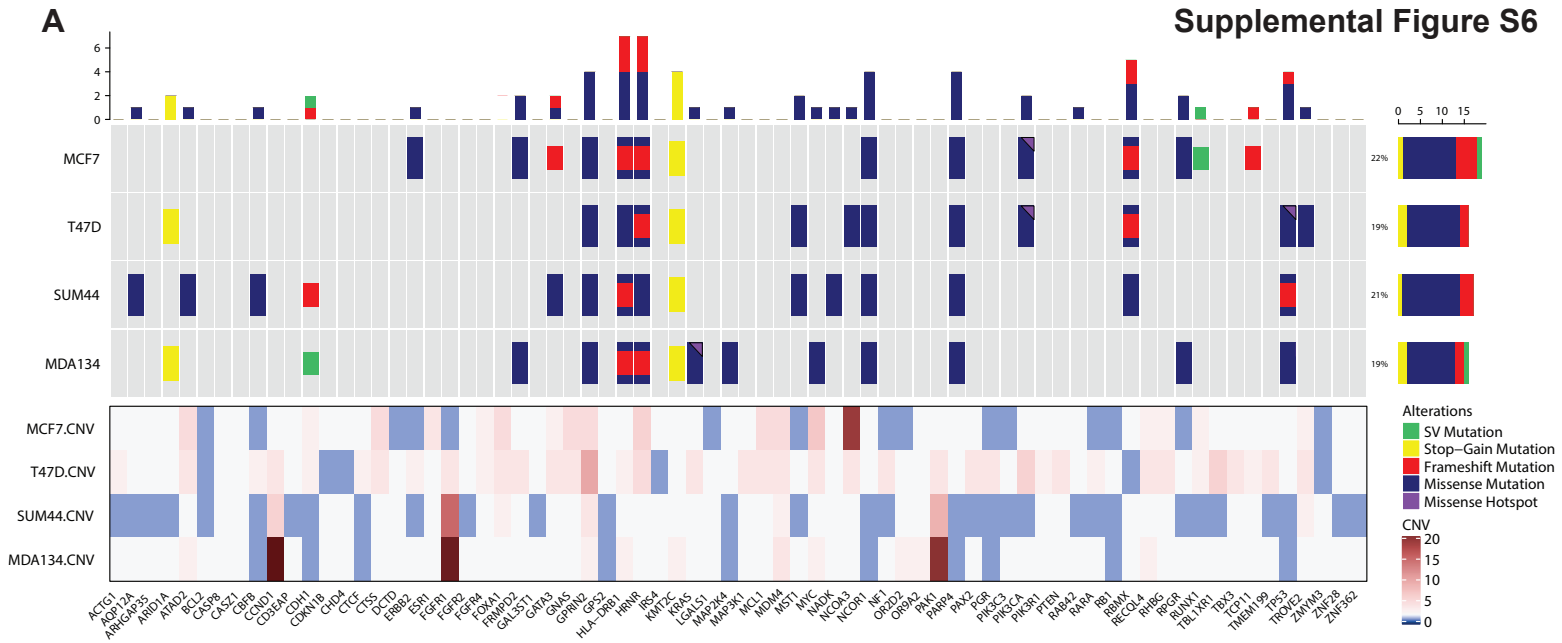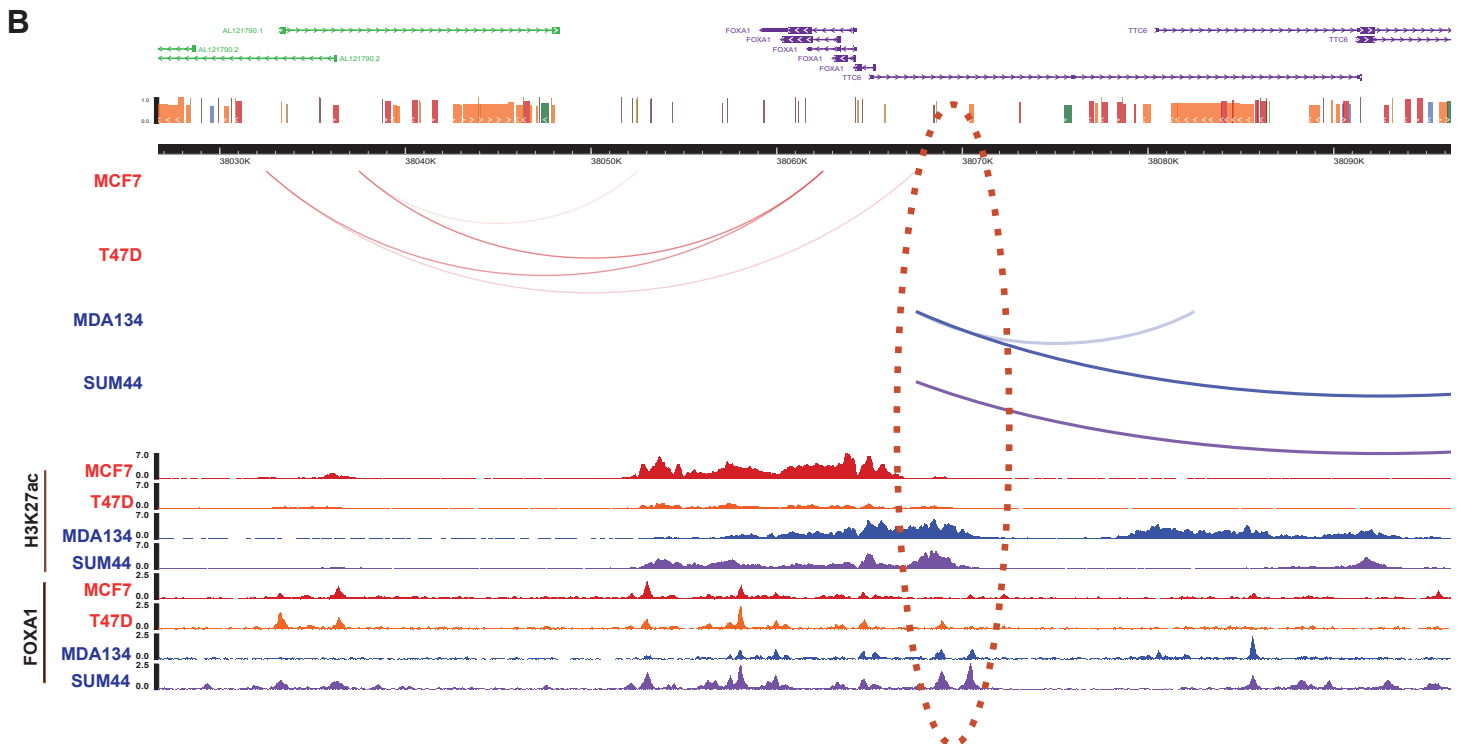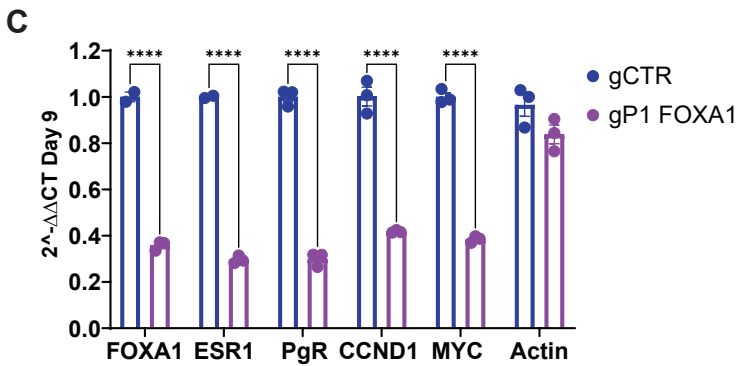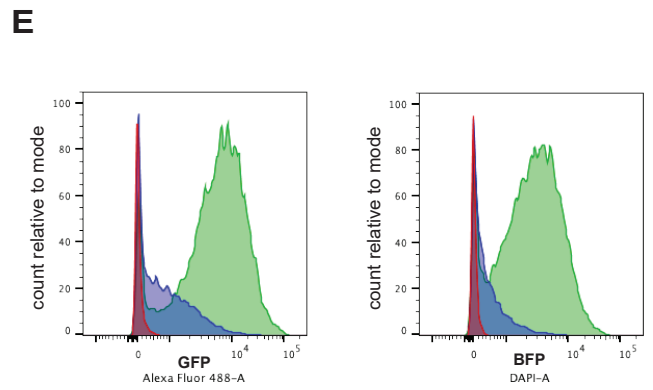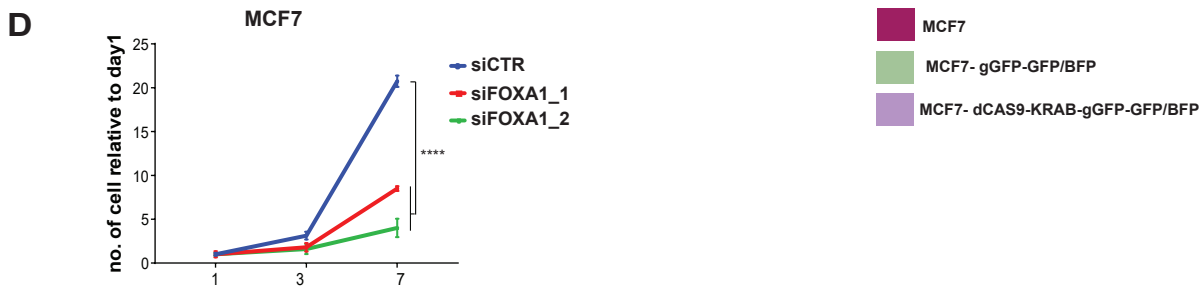

Supplement: NIHMS1830937-supplement-7.pdf [file NIHMS1830937-supplement-7.pdf]

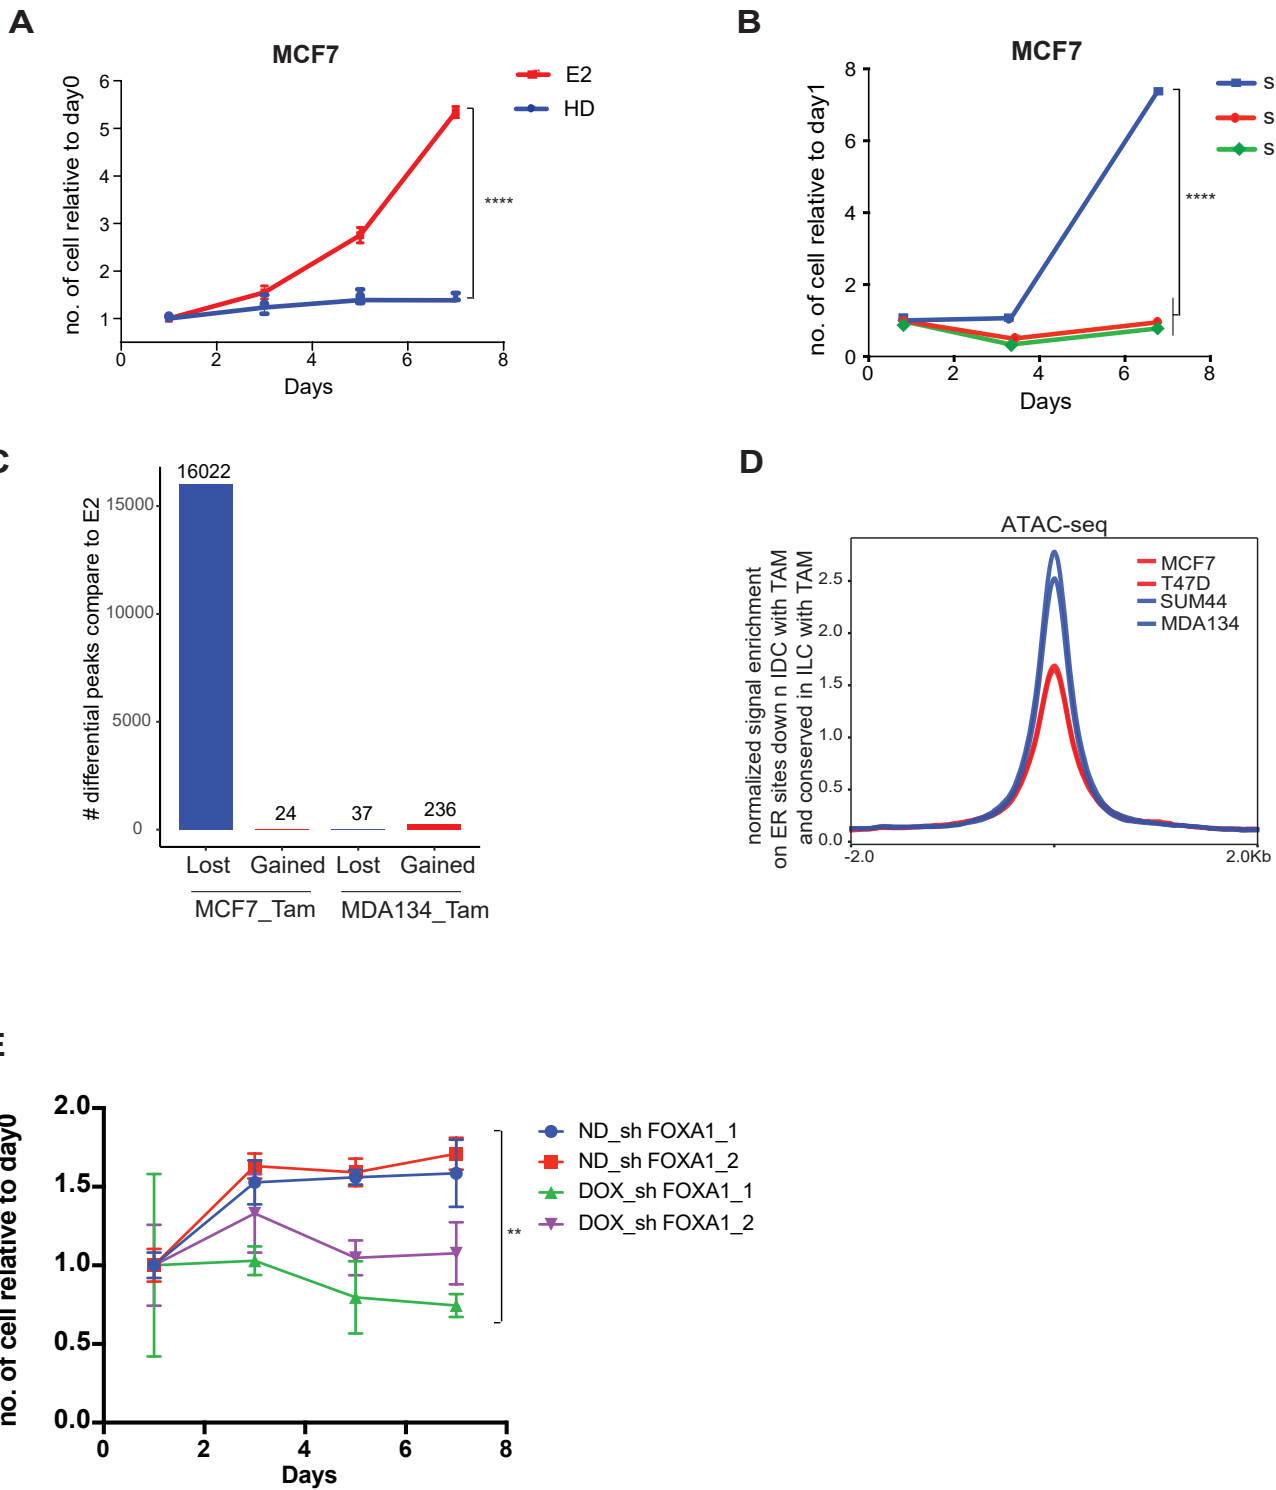

Supplement: NIHMS1830937-supplement-8.pdf [file NIHMS1830937-supplement-8.pdf]
